# Supplementary material
Source: HighWire-hosted journal article supplement (https://jitc.bmj.com/content/9/7/e002773)
Supplement: inline-supplementary-material-1 [file inline-supplementary-material-1.xlsx]

## Sheet: Supplementary Table S1
Supplementary Table S1. Flow cytometry antibody staining panels.
Marker	Fluorophore	Clone	Extracellular (E) or Intracellular (I)	Dilution	Source
Myeloid Panel
LIVE/DEAD Fixable Blue	DAPI	N/A	N/A	1/500	ThermoFisher
α-CD45	APC-efluor780	30-F11	E	1/250	Invitrogen
α-MHCII	AF700	MS/114.15.2	E	1/800	eBioscience
α-CD11c	PE-Cy5	N418	E	1/400	Invitrogen
α-F4/80	Pacific Blue	BM8	E	1/250	eBioscience
α-CD11b	BV650	M1/70	E	1/400	BD Biosciences
α-Ly6C	PerCP-Cy5.5	HK1.4	E	1/200	Invitrogen
α-Ly6G	PE	RB6-8CS	E	1/300	eBioscience
T cell Panel
LIVE/DEAD Fixable Blue	DAPI	N/A	N/A	1/500	ThermoFisher
α-CD45	APC-efluor780	30-F11	E	1/250	Invitrogen
α-TcRβ	PE-Cy5	HS7-597	E	1/800	eBioscience
α-CD8α	PE, FITC	KT15	E	1/200	Santa Cruz Biotechnology, Invitrogen
CD4			I		Invitrogen
FOXP3			I		Invitrogen

## Sheet: Supplementary Table S2
Supplementary Table S2. Gene expression values
Gene ID	Log2 fold change	std error (log2)	Lower confidence limit (log2)	Upper confidence limit (log2)	Linear fold change	Lower confidence limit (linear)	Upper confidence limit (linear)	P-value	BY.p.value	method	Gene.sets	probe.ID
Cd6-mRNA	4.42	0.14	4.14	4.69	21.3	17.6	25.8	1.6e-10	8.06e-07	loglinear	Adhesion, CD molecules	NM_001037801.2:1315
Tapbp-mRNA	1.79	0.125	1.54	2.03	3.45	2.91	4.09	1.69e-07	0.000426	lm.nb	Antigen Processing, MHC	NM_009318.2:2195
Ccr5-mRNA	1.58	0.129	1.33	1.84	3	2.52	3.57	6.28e-07	0.000577	lm.nb	Adaptive, CD molecules, Chemokines & Receptors, Cytokines & Receptors, Dendritic Cell Functions, Macrophage Functions, T-Cell Functions, Transporter Functions	NM_009917.5:1340
H2-T23-mRNA	1.58	0.13	1.33	1.84	3	2.51	3.58	6.59e-07	0.000577	lm.nb	Antigen Processing, MHC, T-Cell Functions	NM_010398.3:441
Irf1-mRNA	1.92	0.159	1.6	2.23	3.78	3.04	4.69	7.54e-07	0.000577	lm.nb	Interleukins, T-Cell Functions	NM_008390.1:365
Cd74-mRNA	2.38	0.199	1.99	2.77	5.21	3.97	6.83	7.98e-07	0.000577	lm.nb	Antigen Processing, B-Cell Functions, CD molecules, Innate, MHC, T-Cell Functions	NM_001042605.1:391
Itgal-mRNA	1.81	0.152	1.51	2.11	3.51	2.86	4.31	8.01e-07	0.000577	lm.nb	Adhesion, CD molecules, Leukocyte Functions, T-Cell Functions	NM_008400.2:950
Fcgr4-mRNA	2.8	0.245	2.32	3.28	6.98	5	9.74	1.17e-06	0.000639	lm.nb	CD molecules, T-Cell Functions	NM_144559.1:608
H2-Ab1-mRNA	2.27	0.2	1.87	2.66	4.81	3.67	6.31	1.25e-06	0.000639	lm.nb	Antigen Processing, Interferon, MHC, T-Cell Functions	NM_207105.2:164
H2-Aa-mRNA	2.25	0.199	1.86	2.64	4.75	3.63	6.22	1.27e-06	0.000639	lm.nb	Antigen Processing, Interferon, MHC, T-Cell Functions	NM_010378.2:450
Cybb-mRNA	2.02	0.184	1.66	2.38	4.06	3.16	5.21	1.66e-06	0.000749	lm.nb	Innate, Transporter Functions	NM_007807.2:1535
Ctss-mRNA	2.1	0.195	1.72	2.49	4.3	3.3	5.6	1.9e-06	0.000749	lm.nb	Innate	NM_021281.2:740
Stat1-mRNA	2.38	0.221	1.95	2.82	5.22	3.86	7.05	1.93e-06	0.000749	lm.nb	Adaptive, Cytokines & Receptors, Innate, T-Cell Functions	NM_009283.3:1590
Itgb2-mRNA	1.57	0.148	1.28	1.86	2.96	2.42	3.62	2.19e-06	0.000765	lm.nb	CD molecules, Humoral, Inflammation, Leukocyte Functions, NK Cell Functions, T-Cell Functions, Transporter Functions	NM_008404.4:2542
Cd180-mRNA	1.9	0.181	1.55	2.26	3.74	2.93	4.79	2.39e-06	0.000765	lm.nb	CD molecules, Inflammation, Innate	NM_008533.2:860
Cd86-mRNA	1.75	0.167	1.42	2.07	3.35	2.67	4.21	2.42e-06	0.000765	lm.nb	Adaptive, B-Cell Functions, CD molecules, Dendritic Cell Functions, T-Cell Functions, TLR	NM_019388.3:251
Abcg1-mRNA	1.33	0.134	1.07	1.59	2.51	2.1	3.01	3.71e-06	0.00106	lm.nb	Innate, Transporter Functions	NM_009593.1:295
Irgm2-mRNA	2.84	0.286	2.28	3.4	7.17	4.86	10.6	3.79e-06	0.00106	lm.nb	Innate, Interferon	NM_019440.2:2555
Slamf7-mRNA	3.16	0.322	2.53	3.8	8.97	5.79	13.9	4.13e-06	0.0011	lm.nb	CD molecules, Innate, NK Cell Functions	NM_144539.5:750
Cd3d-mRNA	2.03	0.209	1.62	2.44	4.09	3.08	5.44	4.56e-06	0.00115	lm.nb	CD molecules, T-Cell Functions	NM_013487.2:289
Ptprc-mRNA	1.31	0.136	1.04	1.57	2.48	2.06	2.98	4.84e-06	0.00116	lm.nb	B-Cell Functions, CD molecules, Cytokines & Receptors, T-Cell Functions	NM_011210.3:2320
Klrd1-mRNA	2.62	0.275	2.08	3.16	6.17	4.24	8.96	5.31e-06	0.00121	lm.nb	NK Cell Functions	NM_010654.2:434
Psmb10-mRNA	2.02	0.213	1.6	2.43	4.04	3.03	5.4	5.68e-06	0.00121	lm.nb	Humoral, T-Cell Functions	NM_013640.3:401
H2-Eb1-mRNA	2.04	0.216	1.62	2.47	4.12	3.07	5.53	5.74e-06	0.00121	lm.nb	Antigen Processing, Interleukins, MHC	NM_010382.2:935
Cd8a-mRNA	3.38	0.365	2.67	4.1	10.4	6.35	17.1	6.67e-06	0.00135	lm.nb	Adaptive, CD molecules, Innate, T-Cell Functions	NM_001081110.2:355
Stat2-mRNA	1.64	0.178	1.29	1.99	3.11	2.45	3.96	7.03e-06	0.00136	lm.nb	Basic Cell Functions	NM_019963.1:362
Tap2-mRNA	2.02	0.223	1.58	2.45	4.05	2.99	5.48	8.09e-06	0.00139	lm.nb	Antigen Processing, MHC, Transporter Functions	NM_011530.2:495
Hck-mRNA	1.83	0.202	1.43	2.22	3.55	2.7	4.67	8.12e-06	0.00139	lm.nb	Inflammation, Innate	NM_010407.3:1874
Cd47-mRNA	0.812	0.0898	0.636	0.987	1.76	1.55	1.98	8.22e-06	0.00139	loglinear	CD molecules, Inflammation, T-Cell Functions, Transporter Functions	NM_010581.3:165
Ccl5-mRNA	3.54	0.392	2.77	4.31	11.7	6.84	19.9	8.25e-06	0.00139	lm.nb	Adaptive, Cancer Progression, Chemokines & Receptors, Dendritic Cell Functions, Inflammation, Innate, Macrophage Functions, NK Cell Functions, T-Cell Functions, Transporter Functions	NM_013653.3:240
H2-DMb1-mRNA	2.26	0.252	1.77	2.75	4.79	3.41	6.75	8.64e-06	0.00141	lm.nb	Antigen Processing, MHC	NM_010387.2:1089
Fcer1g-mRNA	1.49	0.167	1.16	1.82	2.81	2.24	3.52	9.09e-06	0.00142	lm.nb	Antigen Processing, Interleukins, MHC, Transporter Functions	NM_010185.4:264
Il21r-mRNA	1.73	0.195	1.35	2.11	3.32	2.55	4.33	9.31e-06	0.00142	lm.nb	CD molecules, Cytokines & Receptors	NM_021887.1:619
Spn-mRNA	2.54	0.286	1.97	3.1	5.8	3.93	8.56	9.77e-06	0.00145	lm.nb	Adhesion, Apoptosis, CD molecules, T-Cell Functions	NM_001037810.1:726
Cd3g-mRNA	2.54	0.29	1.97	3.1	5.8	3.91	8.6	1.09e-05	0.00157	lm.nb	Apoptosis, CD molecules, T-Cell Functions, Transporter Functions	NM_009850.2:430
Ciita-mRNA	2.91	0.336	2.25	3.57	7.52	4.76	11.9	1.17e-05	0.00163	lm.nb	Interferon, MHC	NM_007575.2:1358
Cd3e-mRNA	3.13	0.362	2.42	3.84	8.75	5.35	14.3	1.19e-05	0.00163	lm.nb	CD molecules, Interferon, Interleukins, T-Cell Functions	NM_007648.4:380
Pou2f2-mRNA	1.92	0.224	1.48	2.36	3.79	2.79	5.13	1.28e-05	0.00171	lm.nb	Humoral, T-Cell Functions	NM_001163556.1:52
Il2rb-mRNA	2.2	0.259	1.69	2.7	4.59	3.23	6.52	1.37e-05	0.00177	lm.nb	CD molecules, Cytokines & Receptors, Interleukins, NK Cell Functions	NM_008368.3:2365
Il2rg-mRNA	1.51	0.178	1.16	1.86	2.85	2.23	3.63	1.41e-05	0.00177	lm.nb	B-Cell Functions, CD molecules, Cytokines & Receptors, Interleukins, T-Cell Functions	NM_013563.3:1226
Il6ra-mRNA	0.475	0.0576	0.362	0.588	1.39	1.29	1.5	1.72e-05	0.00212	loglinear	CD molecules, Chemokines & Receptors, Cytokines & Receptors, Interleukins	NM_010559.2:2825
Klrk1-mRNA	2.36	0.289	1.79	2.92	5.12	3.45	7.58	1.93e-05	0.00223	lm.nb	CD molecules, MHC, NK Cell Functions	NM_001083322.1:144
Klra2-mRNA	1.63	0.201	1.24	2.03	3.1	2.36	4.07	1.93e-05	0.00223	lm.nb	NK Cell Functions	NM_001170851.1:420
Ctsh-mRNA	0.721	0.0891	0.546	0.895	1.65	1.46	1.86	2.02e-05	0.00223	lm.nb	Apoptosis, MHC, T-Cell Functions	NM_007801.2:1090
Bst1-mRNA	2.1	0.26	1.59	2.61	4.29	3.01	6.11	2.04e-05	0.00223	lm.nb	CD molecules, Humoral	NM_009763.3:854
Xcl1-mRNA	3.63	0.449	2.75	4.51	12.4	6.71	22.7	2.05e-05	0.00223	lm.nb	Chemokines & Receptors, Cytokines & Receptors, Inflammation, Innate, T-Cell Functions	NM_008510.1:103
Cxcl9-mRNA	2.77	0.345	2.1	3.45	6.83	4.28	10.9	2.13e-05	0.00223	lm.nb	Adaptive, Chemokines & Receptors, Cytokines & Receptors, Inflammation, Innate	NM_008599.2:40
Cd40-mRNA	1.39	0.173	1.05	1.73	2.62	2.07	3.32	2.14e-05	0.00223	lm.nb	Adaptive, B-Cell Functions, CD molecules, Dendritic Cell Functions, Humoral, Inflammation, T-Cell Functions, TNF Superfamily	NM_011611.2:1425
Selplg-mRNA	1.65	0.206	1.25	2.06	3.15	2.38	4.17	2.17e-05	0.00223	lm.nb	Adhesion, CD molecules, Leukocyte Functions	NM_009151.3:1712
Ifitm1-mRNA	1.53	0.192	1.16	1.91	2.9	2.23	3.76	2.25e-05	0.00227	lm.nb	CD molecules, Innate, Interferon	NM_001112715.1:412
Cxcl10-mRNA	2.57	0.325	1.94	3.21	5.96	3.83	9.26	2.38e-05	0.00235	lm.nb	Adaptive, Chemokines & Receptors, Cytokines & Receptors, Inflammation, Innate, Leukocyte Functions	NM_021274.1:115
Il15ra-mRNA	1.75	0.222	1.32	2.19	3.37	2.49	4.56	2.46e-05	0.00235	lm.nb	CD molecules, NK Cell Functions	NM_008358.2:800
Cd247-mRNA	2.03	0.258	1.53	2.54	4.1	2.89	5.81	2.46e-05	0.00235	lm.nb	CD molecules, NK Cell Functions, T-Cell Functions	NM_001113391.2:215
Cd244-mRNA	1.26	0.161	0.948	1.58	2.4	1.93	2.99	2.56e-05	0.00239	lm.nb	CD molecules, NK Cell Functions	NM_018729.2:262
Tap1-mRNA	2.69	0.343	2.02	3.36	6.45	4.05	10.3	2.6e-05	0.00239	lm.nb	Antigen Processing, MHC, T-Cell Functions, Transporter Functions	NM_001161730.1:856
Casp1-mRNA	2.33	0.299	1.74	2.92	5.03	3.35	7.56	2.75e-05	0.00248	lm.nb	Cytokines & Receptors, Innate, Interleukins, Microglial Functions	NM_009807.2:259
Xaf1-mRNA	1.87	0.243	1.4	2.35	3.67	2.64	5.1	2.93e-05	0.00256	lm.nb	Apoptosis	NM_001037713.3:100
Il7r-mRNA	1.71	0.221	1.27	2.14	3.27	2.42	4.41	2.94e-05	0.00256	lm.nb	B-Cell Functions, CD molecules, Cytokines & Receptors, T-Cell Functions	NM_008372.3:1020
Zbp1-mRNA	2.84	0.369	2.12	3.56	7.16	4.34	11.8	3.03e-05	0.00256	lm.nb	Innate	NM_021394.2:473
Cd48-mRNA	1.72	0.224	1.28	2.16	3.3	2.43	4.47	3.04e-05	0.00256	lm.nb	CD molecules, T-Cell Functions	NM_007649.4:370
Tnfrsf1b-mRNA	1.1	0.144	0.819	1.38	2.14	1.76	2.61	3.12e-05	0.00256	lm.nb	CD molecules, Inflammation, TNF Superfamily	NM_011610.3:3270
Tnfrsf14-mRNA	1.55	0.202	1.15	1.94	2.92	2.22	3.85	3.17e-05	0.00256	lm.nb	CD molecules, T-Cell Functions, TNF Superfamily	NM_178931.2:625
Fcgr2b-mRNA	1.32	0.172	0.978	1.65	2.49	1.97	3.15	3.19e-05	0.00256	lm.nb	Antigen Processing, B-Cell Functions, CD molecules, Inflammation, Interleukins, MHC, Transporter Functions	NM_001077189.1:1225
Ncf4-mRNA	1.11	0.146	0.824	1.4	2.16	1.77	2.63	3.33e-05	0.00262	lm.nb	Basic Cell Functions, Innate	NM_008677.2:741
Socs1-mRNA	1.27	0.168	0.942	1.6	2.42	1.92	3.04	3.5e-05	0.00272	lm.nb	Cytokines & Receptors, T-Cell Functions	NM_009896.2:1020
Serping1-mRNA	1.22	0.161	0.9	1.53	2.32	1.87	2.89	3.56e-05	0.00272	lm.nb	Complement Pathway, Innate	NM_009776.3:1480
Trem2-mRNA	1.05	0.14	0.779	1.33	2.07	1.72	2.51	3.62e-05	0.00272	lm.nb	Basic Cell Functions, Humoral	NM_031254.2:646
Ifng-mRNA	3.36	0.447	2.48	4.23	10.2	5.58	18.8	3.66e-05	0.00272	lm.nb	Adaptive, Chemokines & Receptors, Cytokines & Receptors, Humoral, Interleukins, Pathogen Response, Senescence, T-Cell Functions, Transporter Functions	NM_008337.1:95
Itgax-mRNA	1.36	0.183	1	1.72	2.57	2	3.3	3.96e-05	0.00282	lm.nb	Adhesion, CD molecules, Innate, T-Cell Functions	NM_021334.2:327
Prf1-mRNA	3.08	0.414	2.27	3.89	8.44	4.81	14.8	3.97e-05	0.00282	lm.nb		NM_011073.2:1350
Icos-mRNA	2.61	0.351	1.92	3.3	6.1	3.79	9.84	3.97e-05	0.00282	lm.nb	CD molecules, T-Cell Functions	NM_017480.1:142
Ikzf1-mRNA	1.61	0.219	1.18	2.04	3.05	2.26	4.1	4.35e-05	0.00305	lm.nb	B-Cell Functions, NK Cell Functions, T-Cell Functions	NM_001025597.1:4420
Cxcl11-mRNA	2.83	0.386	2.07	3.58	7.1	4.2	12	4.41e-05	0.00305	lm.nb	Chemokines & Receptors, Cytokines & Receptors, Inflammation, Innate	NM_019494.1:345
C1ra-mRNA	1.35	0.184	0.985	1.71	2.54	1.98	3.26	4.48e-05	0.00306	lm.nb	Complement Pathway, Innate	NM_023143.3:1923
C3ar1-mRNA	1.04	0.143	0.762	1.32	2.06	1.7	2.5	4.64e-05	0.0031	lm.nb	Adaptive, Cancer Progression, Complement Pathway, Inflammation, Macrophage Functions	NM_009779.2:555
H2-M3-mRNA	1.51	0.208	1.11	1.92	2.85	2.15	3.78	4.66e-05	0.0031	lm.nb	Antigen Processing, MHC, NK Cell Functions, T-Cell Functions	NM_013819.2:1180
Psmb8-mRNA	2.6	0.359	1.9	3.3	6.06	3.73	9.87	4.82e-05	0.00316	lm.nb	Antigen Processing	NM_010724.2:362
Cyfip2-mRNA	2.04	0.282	1.49	2.59	4.11	2.8	6.03	4.94e-05	0.0032	lm.nb	Adhesion, Apoptosis, Innate	NM_001252459.1:1136
C1s1-mRNA	1.68	0.234	1.22	2.14	3.2	2.33	4.4	5.25e-05	0.00335	lm.nb	Complement Pathway, Innate	NM_144938.2:2490
Tlr9-mRNA	1.86	0.261	1.35	2.38	3.64	2.56	5.19	5.32e-05	0.00336	lm.nb	CD molecules, Chemokines & Receptors, Inflammation, Innate, Interleukins, TLR, Transporter Functions	NM_031178.2:1801
Il12rb1-mRNA	2.62	0.368	1.9	3.34	6.14	3.73	10.1	5.56e-05	0.00346	lm.nb	CD molecules, Cytokines & Receptors, Interleukins, NK Cell Functions, T-Cell Functions	NM_008353.2:1088
Tlr8-mRNA	1.7	0.241	1.23	2.18	3.26	2.35	4.52	5.94e-05	0.00366	lm.nb	CD molecules, Inflammation, Innate, Interleukins, Pathogen Response, TLR	NM_133212.2:110
Ctla4-mRNA	1.85	0.263	1.34	2.37	3.61	2.53	5.16	6.01e-05	0.00366	lm.nb	B-Cell Functions, CD molecules, T-Cell Functions	NM_009843.3:1475
Il2ra-mRNA	2.02	0.288	1.46	2.59	4.06	2.75	6	6.13e-05	0.00368	lm.nb	Adaptive, B-Cell Functions, CD molecules, Inflammation, T-Cell Functions	NM_008367.2:325
Bst2-mRNA	1.57	0.225	1.13	2.01	2.98	2.19	4.04	6.32e-05	0.00375	lm.nb	CD molecules, Humoral, Innate	NM_198095.2:468
C2-mRNA	1.74	0.249	1.25	2.22	3.33	2.37	4.67	6.58e-05	0.00381	lm.nb	Complement Pathway, Innate	NM_013484.2:2359
Fcgr3-mRNA	1.5	0.216	1.08	1.92	2.83	2.11	3.79	6.62e-05	0.00381	lm.nb	Antigen Processing, CD molecules, MHC, Transporter Functions	NM_010188.5:1175
Notch1-mRNA	0.92	0.133	0.661	1.18	1.89	1.58	2.27	6.73e-05	0.00381	lm.nb	Basic Cell Functions	NM_008714.2:1425
H2-DMa-mRNA	1.86	0.268	1.33	2.38	3.62	2.52	5.21	6.83e-05	0.00381	lm.nb	Antigen Processing, MHC, T-Cell Functions	NM_010386.3:530
Cfb-mRNA	1.84	0.265	1.32	2.36	3.58	2.5	5.13	6.83e-05	0.00381	lm.nb	Complement Pathway, Innate	NM_008198.2:1685
Tlr2-mRNA	1.77	0.256	1.27	2.27	3.42	2.41	4.84	6.87e-05	0.00381	lm.nb	CD molecules, Inflammation, Innate, Leukocyte Functions, TLR	NM_011905.2:255
Ddx58-mRNA	1.31	0.19	0.935	1.68	2.47	1.91	3.2	7.13e-05	0.00391	lm.nb	Innate, Interferon	NM_172689.3:1751
Ccl1-mRNA	2.72	0.396	1.94	3.5	6.58	3.84	11.3	7.37e-05	0.004	lm.nb	Adaptive, Chemokines & Receptors, Cytokines & Receptors, Inflammation	NM_011329.2:145
Psmb9-mRNA	2.62	0.384	1.86	3.37	6.14	3.64	10.3	7.79e-05	0.00419	lm.nb	Antigen Processing	NM_013585.2:540
Ifi35-mRNA	1.22	0.18	0.866	1.57	2.33	1.82	2.97	8.24e-05	0.00438	lm.nb	Interferon	NM_027320.4:820
Fcgr1-mRNA	1.83	0.271	1.3	2.36	3.55	2.46	5.13	8.42e-05	0.00443	lm.nb	Antigen Processing, CD molecules, Innate, MHC, Transporter Functions	NM_010186.5:185
Il10ra-mRNA	1.41	0.209	0.998	1.82	2.65	2	3.52	8.52e-05	0.00443	lm.nb	CD molecules	NM_008348.2:75
C1qb-mRNA	1.51	0.225	1.07	1.96	2.86	2.1	3.88	8.66e-05	0.00446	lm.nb	Complement Pathway, Innate	NM_009777.2:865
Slc11a1-mRNA	1.37	0.205	0.971	1.78	2.59	1.96	3.42	9e-05	0.00459	lm.nb	Adaptive, Antigen Processing, Transporter Functions	NM_013612.2:945
Cd84-mRNA	0.92	0.139	0.647	1.19	1.89	1.57	2.29	9.74e-05	0.00491	lm.nb	Adhesion, CD molecules	NM_001252472.1:188
Gbp5-mRNA	2.49	0.38	1.75	3.24	5.63	3.36	9.44	0.000104	0.00522	lm.nb	Interferon	NM_153564.2:1176
Nos2-mRNA	2	0.308	1.39	2.6	4	2.63	6.07	0.000114	0.00563	lm.nb	Adaptive, Apoptosis, Inflammation, Interferon, T-Cell Functions	NM_010927.3:3715
Lcp1-mRNA	1.25	0.195	0.873	1.64	2.39	1.83	3.11	0.00012	0.00586	lm.nb	T-Cell Functions, Transporter Functions	NM_001247984.1:3344
Tnfsf13-mRNA	1.66	0.258	1.15	2.16	3.16	2.22	4.48	0.000121	0.00586	loglinear	CD molecules, Cytokines & Receptors, TNF Superfamily	NM_023517.2:1443
H2-D1-mRNA	1.98	0.308	1.37	2.58	3.93	2.59	5.98	0.000123	0.00589	lm.nb	Antigen Processing, MHC, T-Cell Functions	NM_010380.3:1133
C1qa-mRNA	1.44	0.225	1	1.88	2.72	2	3.69	0.000124	0.00589	lm.nb	Complement Pathway, Innate	NM_007572.2:566
Pdcd1-mRNA	2.69	0.421	1.87	3.52	6.46	3.65	11.4	0.000126	0.00597	lm.nb	Apoptosis, CD molecules, Humoral, T-Cell Functions	NM_008798.1:1134
Ly86-mRNA	1.59	0.25	1.1	2.08	3.01	2.14	4.22	0.000131	0.00614	lm.nb	Humoral, Inflammation, Innate, Pathogen Response	NM_010745.2:725
Abca1-mRNA	1	0.159	0.689	1.31	2	1.61	2.48	0.000142	0.00657	lm.nb	Innate, Transporter Functions	NM_013454.3:6865
Ido1-mRNA	4.32	0.689	2.97	5.67	20	7.84	51	0.000146	0.00671	lm.nb	Adaptive, Cytokines & Receptors, Inflammation, Interleukins, T-Cell Functions	NM_008324.1:521
Fpr2-mRNA	2.88	0.463	1.98	3.79	7.38	3.94	13.8	0.000153	0.00694	lm.nb	Adaptive, Basic Cell Functions, Inflammation	NM_008039.2:1015
Msr1-mRNA	1.02	0.164	0.698	1.34	2.03	1.62	2.53	0.000156	0.00705	lm.nb	CD molecules, Macrophage Functions, Transporter Functions	NM_001113326.1:555
Irf7-mRNA	1.97	0.319	1.35	2.6	3.92	2.54	6.05	0.000161	0.00719	lm.nb	Adaptive, Innate, Interferon, Senescence	NM_016850.2:705
Nod2-mRNA	2	0.323	1.36	2.63	4	2.58	6.2	0.000163	0.00719	lm.nb	Adaptive, Antigen Processing, Cytokines & Receptors, Humoral, Innate, Interleukins, Microglial Functions	NM_145857.2:1086
Tlr1-mRNA	1.22	0.198	0.832	1.61	2.33	1.78	3.05	0.000164	0.00719	lm.nb	CD molecules, Inflammation, Innate, Interleukins, Macrophage Functions, TLR	NM_030682.1:805
Herc6-mRNA	2.15	0.348	1.47	2.83	4.43	2.76	7.12	0.000165	0.00719	lm.nb	Basic Cell Functions	NM_025992.2:876
Irak4-mRNA	0.592	0.0963	0.403	0.78	1.51	1.32	1.72	0.000171	0.00728	loglinear	Cytokines & Receptors, Innate, Interleukins	NM_029926.5:250
Cxcl16-mRNA	1.03	0.167	0.698	1.35	2.04	1.62	2.56	0.000171	0.00728	lm.nb	Chemokines & Receptors, Cytokines & Receptors, Innate, Interferon	NM_023158.6:679
Cd69-mRNA	2.57	0.42	1.75	3.39	5.95	3.36	10.5	0.000173	0.00728	lm.nb	B-Cell Functions, Macrophage Functions	NM_001033122.3:1370
Ifih1-mRNA	1.3	0.212	0.882	1.71	2.46	1.84	3.28	0.000173	0.00728	lm.nb	Apoptosis, Innate, Interferon	NM_027835.2:1997
Tnf-mRNA	1.81	0.298	1.23	2.4	3.51	2.34	5.27	0.000184	0.00767	lm.nb	Adaptive, Chemokines & Receptors, Cytokines & Receptors, Humoral, Inflammation, Pathogen Response, T-Cell Functions, TNF Superfamily , Transporter Functions	NM_013693.1:1135
Icosl-mRNA	1.09	0.18	0.734	1.44	2.12	1.66	2.71	0.000195	0.00806	lm.nb	B-Cell Functions, CD molecules, Interleukins, T-Cell Functions	NM_015790.3:349
Flt3l-mRNA	1.09	0.184	0.735	1.45	2.14	1.66	2.74	0.000212	0.00871	lm.nb	Cytokines & Receptors, NK Cell Functions	NM_013520.2:529
Pdcd1lg2-mRNA	1.89	0.319	1.27	2.51	3.71	2.4	5.71	0.00022	0.00886	lm.nb	CD molecules, T-Cell Functions	NM_021396.2:1870
Slamf6-mRNA	1.53	0.259	1.03	2.04	2.9	2.04	4.12	0.00022	0.00886	lm.nb	CD molecules	NM_030710.2:805
Ifit3-mRNA	1.6	0.269	1.07	2.13	3.03	2.1	4.36	0.000221	0.00886	lm.nb	Interferon	NM_010501.1:1290
Ltb-mRNA	3.14	0.531	2.1	4.18	8.83	4.29	18.2	0.000226	0.00895	lm.nb	Cytokines & Receptors, Interleukins, TNF Superfamily	NM_008518.2:163
Ikbke-mRNA	1.04	0.177	0.698	1.39	2.06	1.62	2.62	0.000227	0.00895	lm.nb	Apoptosis, Innate	NM_019777.3:618
Entpd1-mRNA	1.12	0.19	0.744	1.49	2.17	1.67	2.8	0.000234	0.00915	lm.nb	CD molecules	NM_009848.3:2062
Ccr1-mRNA	1.03	0.175	0.685	1.37	2.04	1.61	2.59	0.000237	0.00919	lm.nb	Adaptive, CD molecules, Chemokines & Receptors, Cytokines & Receptors, Dendritic Cell Functions, Inflammation, Innate, Leukocyte Functions, Transporter Functions	NM_009912.4:1526

## Sheet: Supplementary Table S3
Supplementary Table S3. Immune response
Immune response	Directed Treatment: differential expression in metformin vs. baseline of control
MHC	7.544
Antigen Processing	7.46
Dendritic Cell Functions	5.918
Interferon	5.53
Adhesion	5.333
T-Cell Functions	5.099
Microglial Functions	4.948
NK Cell Functions	4.831
Transporter Functions	4.572
Leukocyte Functions	4.532
Complement Pathway	4.484
TLR	4.399
Humoral	4.256
Chemokines & Receptors	4.17
Interleukins	4.152
TNF Superfamily	4.072
B-Cell Functions	4.069
Inflammation	4.021
Macrophage Functions	3.945
Cytokines & Receptors	3.818
Basic Cell Functions	3.466
Pathogen Response	3.395
Senescence	3.166
Apoptosis	3.156
Cancer Progression	2.807
Cell Cycle	2.354
