# Supplementary material
Source: HighWire-hosted journal article supplement (https://jitc.bmj.com/content/9/7/e002773)

**SUPPLEMENTARY FIGURE S2**

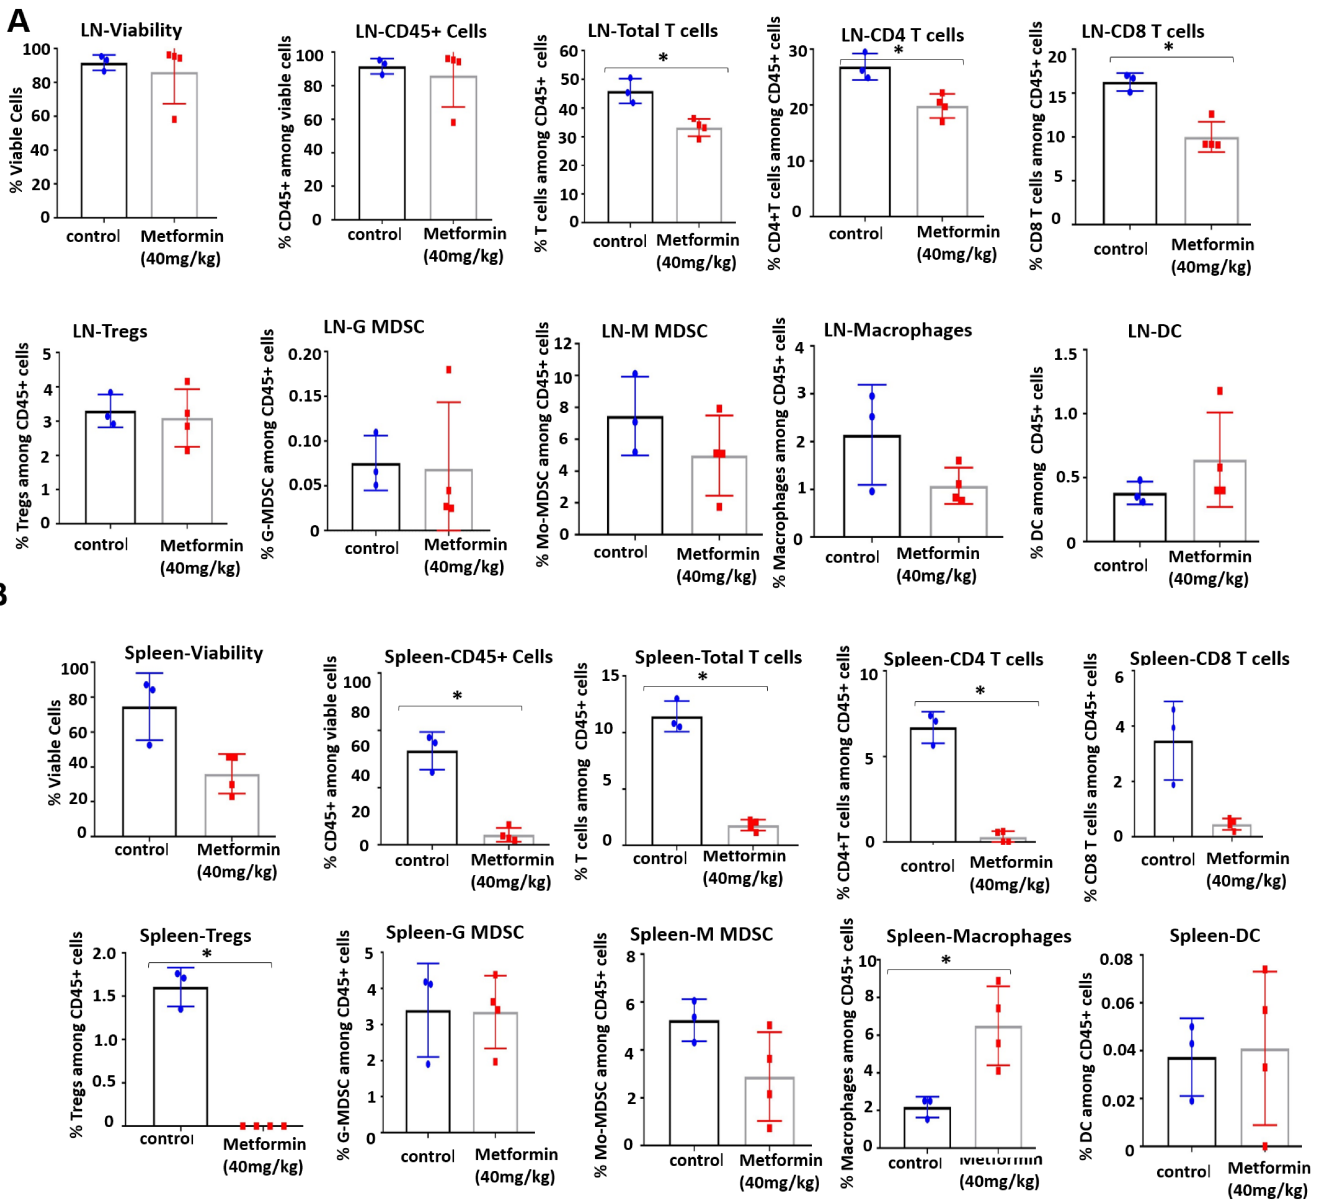

Supplement: inline-supplementary-material-4 [file inline-supplementary-material-4.pdf]

### Supplementary Figure 3

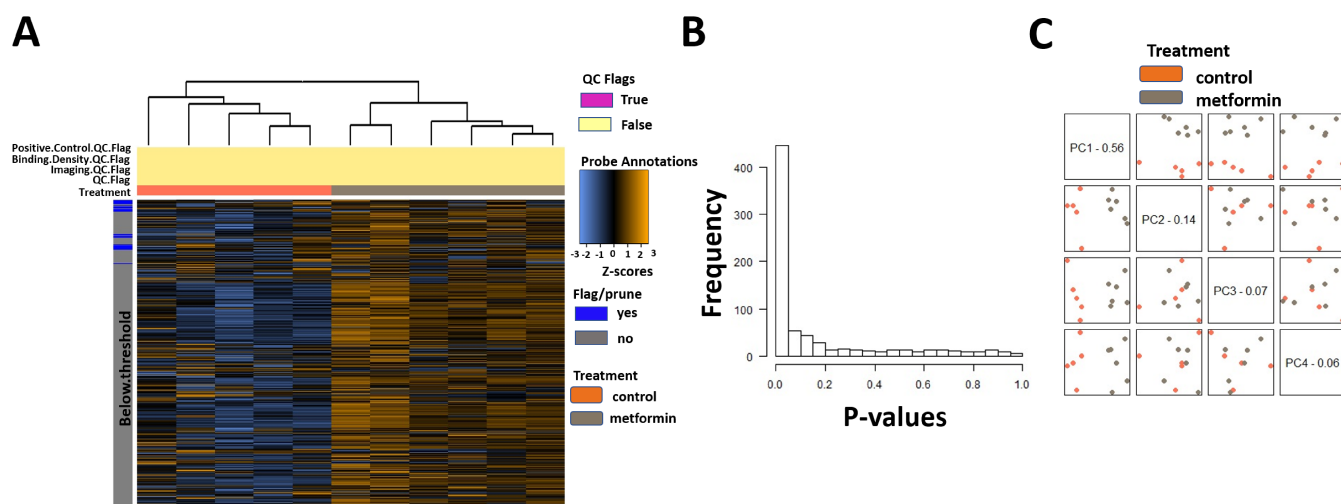

Supplement: inline-supplementary-material-5 [file inline-supplementary-material-5.pdf]
